# Supplementary material for: Evaluation of the usefulness and safety of percutaneous CO2 monitoring during bronchoscopic intervention
Source: Research Square preprint supplement (doi:10.21203/rs.3.rs-6547703/v1), 2026-01-12
Supplement: Supplementary file 1 [file d42fa90238c5adccc983f1d8.docx]

Supplementary Table S1. Individual patient data.

| **Case** | **Sex** | **Age, years** | **Height, cm** | **Weight, kg** | **BMI, kg/m2** | **Underlying diseases** | **Procedures performed** |
| --- | --- | --- | --- | --- | --- | --- | --- |
| 1 | F | 71 | 148.0 | 34.0 | 15.5 | Lung cancer | Stent placement |
| 2 | F | 77 | 147.4 | 45.8 | 21.1 | Esophageal cancer | Balloon dilation |
| 3 | F | 67 | 147.1 | 58.1 | 26.9 | COPD | APC |
| 4 | F | 43 | 156.7 | 53.4 | 21.7 | Lung cancer | Tumor resection |
| 5 | F | 86 | 151.7 | 48.55 | 21.1 | Lung cancer | Stent placement |
| 6 | M | 72 | 175.0 | 34.2 | 11.2 | COPD | Stent removal |
| 7 | F | 33 | 162.0 | 44.2 | 16.8 | EBTB | APC |
| 8 | M | 59 | 167.5 | 51.0 | 18.2 | Lung cancer | Stent placement |
| 9 | F | 60 | 150.0 | 35.0 | 15.6 | Esophageal cancer | Stent removal |
| 10 | M | 80 | 165.8 | 51.0 | 18.6 | Lung cancer | Balloon dilation |
| 11 | M | 67 | 166.0 | 41.4 | 15.0 | Lung cancer | Tumor resection |
| 12 | F | 71 | 146.0 | 46.9 | 22.0 | EBTB | Stent placement |
| 13 | F | 83 | 148.0 | 54.0 | 24.7 | Lung cancer | APC |
| 14 | M | 74 | 165.2 | 46.5 | 17.0 | Tracheoesophageal fistula | Stent placement |
| 15 | F | 74 | 153.9 | 46.2 | 19.5 | Lung cancer | Stent placement |
| 16 | F | 69 | 153.0 | 47.1 | 20.1 | COPD | APC |
| 17 | F | 71 | 153.9 | 51.4 | 21.7 | Lung cancer | Balloon dilation |
| 18 | F | 51 | 157.9 | 40.0 | 16.0 | TB | Stent removal |
| 19 | M | 59 | 162.5 | 65.0 | 24.6 | Lung cancer | Stent placement |
| 20 | M | 60 | 167.5 | 51.0 | 18.2 | COPD | Stent placement |
| 21 | F | 72 | 164.0 | 33.2 | 12.3 | Esophageal cancer | Stent placement |
| 22 | M | 57 | 169.0 | 67.0 | 23.5 | COPD | Stent removal |
| 23 | M | 71 | 172.0 | 72.3 | 24.4 | Lung cancer | Tumor resection |
| 24 | M | 79 | 156.5 | 52.0 | 21.2 | TB | APC |
| 25 | M | 57 | 168.4 | 50.2 | 17.7 | Lung cancer | Balloon dilation |
| 26 | M | 68 | 174.7 | 63.7 | 20.9 | Benign airway  tumor | Stent placement |
| 27 | F | 75 | 152.0 | 44.3 | 19.2 | Lung cancer | Stent placement |
| 28 | M | 71 | 166.6 | 51.2 | 18.4 | Malignant  mediastinal tumor | Tumor resection |
| 29 | M | 40 | 162.9 | 61.4 | 23.1 | COPD | Stent placement |
| 30 | F | 57 | 159.3 | 38.3 | 15.1 | Lung cancer | APC |

Abbreviations: APC, argon plasma coagulation; BMI, body mass index; COPD, chronic obstructive pulmonary disease; EBTB, endobronchial tuberculosis; TB, tuberculosis; SD, standard deviation.
